# Supplementary material
Source: Springer Nature journal article supplement (https://www.springermedizin.de/resource/supplementary/12876_2014_1197_MOESM5_ESM.pdf/9438320)

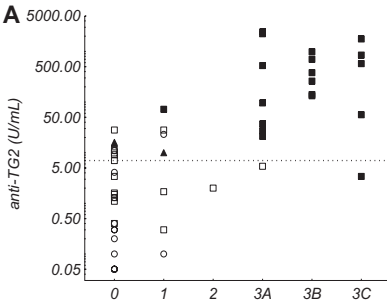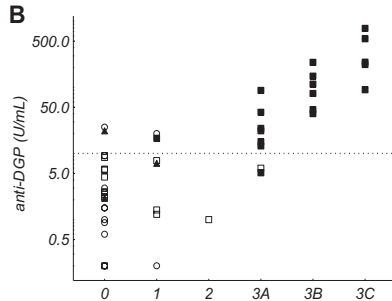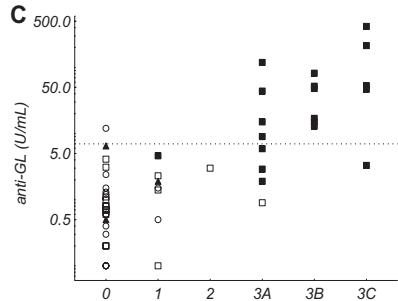

Supplement: MOESM5 [file 9438320]
